# Supplementary material for: Harmonics of Circadian Gene Transcription in Mammals
Source: PLoS Genet. 2009 Apr 3;5(4):e1000442. doi: 10.1371/journal.pgen.1000442 (PMC2654964; doi:10.1371/journal.pgen.1000442)
Supplement: Table S3 — 8 h cycling genes. Cycling genes were identified which had false-discovery rates less than 0.05 in both COSOPT and Fisher's G-test, as well as a COSOPT period length greater than 7 h and less than 9 h. (0.03 MB XLS) [file pgen.1000442.s014.xls]

## Sheet: Sheet1
Probe Set ID	COSOPT q-value	FisherG-q_value	Liver Cosopt Period	Liver FisherG Period	Gene Symbol	Gene Title	RefSeq Protein ID	RefSeq Transcript ID
1435089_at	0.0272497	0.0283617	8	8	2010111I01Rik	RIKEN cDNA 2010111I01 gene	XP_897683.1 /// XP_905290.1 /// XP_924072.1 /// XP_924080.1 /// XP_978339.1 /// XP_993457.1	XM_892590 /// XM_900197 /// XM_918979 /// XM_918987 /// XM_973245 /// XM_988363
1438615_x_at	0.0154225	0.0114815	8.1	8	2010317E24Rik	RIKEN cDNA 2010317E24 gene	XP_130053.4 /// XP_891784.1 /// XP_902081.2 /// XP_919089.1 /// XP_928106.2 /// XP_928120.1 /// XP_982888.1 /// XP_982958.1 /// XP_983025.1 /// XP_993559.1	XM_130053 /// XM_886691 /// XM_896988 /// XM_913996 /// XM_923013 /// XM_923027 /// XM_977794 /// XM_977864 /// XM_977931 /// XM_988465
1428213_at	0.00758178	0.00790945	8.1	8	2410003A14Rik	RIKEN cDNA 2410003A14 gene	XP_133876.5 /// XP_922555.1 /// XP_992770.1	XM_133876 /// XM_917462 /// XM_987676
1428561_at	0.00588472	0.0174854	7.7	8	2610002J23Rik	RIKEN cDNA 2610002J23 gene	---	---
1417913_at	0.0364413	0.0346835	8.2	8	2810037C03Rik	RIKEN cDNA 2810037C03 gene	NP_077202.1	NM_024240
1456868_at	0.00871374	0.00546528	7.9	8	2900073G15Rik	RIKEN cDNA 2900073G15 gene	NP_080340.2	NM_026064
1451376_at	0.00333004	0.0109664	8.3	8	5730596K20Rik	RIKEN cDNA 5730596K20 gene	NP_666203.2	NM_146091
1435018_at	0.00976848	0.0259131	8.3	8	5930434B04Rik	RIKEN cDNA 5930434B04 gene	NP_084138.1	NM_029862
1423244_at	0.00372661	0.012418	8.3	8	9030012A22Rik	RIKEN cDNA 9030012A22 gene	NP_001034644.1	NM_001039555
1417976_at	0.00942615	0.0259313	8	8	Ada	adenosine deaminase	NP_031424.1	NM_007398
1424160_at	0.00620238	0.0169296	8.2	8	Alg5	asparagine-linked glycosylation 5 homolog (yeast, dolichyl-phosphate beta-glucosyltransferase)	NP_079718.1	NM_025442
1419232_a_at	0.00577072	0.00691154	7.8	8	Apoa1	apolipoprotein A-I	NP_033822.1	NM_009692
1419233_x_at	0.0203467	0.0210344	8.1	8	Apoa1	apolipoprotein A-I	NP_033822.1	NM_009692
1438840_x_at	0.009096	0.00520433	7.9	8	Apoa1	apolipoprotein A-I	NP_033822.1	NM_009692
1455201_x_at	0.0125544	0.00141297	7.9	8	Apoa1	apolipoprotein A-I	NP_033822.1	NM_009692
1417950_a_at	0.0128164	0.020383	8.1	8	Apoa2	apolipoprotein A-II	NP_038502.1	NM_013474
1456437_x_at	0.00679297	0.00530517	8.2	8	C1r /// LOC667277 /// LOC677405	complement component 1, r subcomponent /// similar to Complement C1r-B subcomponent precursor (Complement component 1, r-B subcomponent) /// similar to complement component 1, r subcomponent	NP_075632.2 /// XP_001002797.1 /// XP_001002804.1 /// XP_001003221.1	NM_023143 /// XM_001002797 /// XM_001002804 /// XM_001003221
1416429_a_at	0.00542359	0.00110675	8	8	Cat	catalase	NP_033934.1	NM_009804
1451398_at	0.0446313	0.0494906	8.3	24	Cbr4	carbonyl reductase 4	NP_663570.1	NM_145595
1423153_x_at	0.0125544	0.00110472	8	8	Cfh	complement component factor h	NP_034018.1	NM_009888
1450876_at	0.0295256	0.00750193	7.9	8	Cfh	complement component factor h	NP_034018.1	NM_009888
1452381_at	0.00664249	0.0239935	8.3	8	Creb3l2	cAMP responsive element binding protein 3-like 2	NP_848776.1	NM_178661
1435320_at	0.00509202	0.0124432	8.1	8	Ctdspl2	CTD (carboxy-terminal domain, RNA polymerase II, polypeptide A) small phosphatase like 2	NP_997615.1	NM_212450
1439185_x_at	0.011713	0.0439955	8.3	8	D430028G21Rik	RIKEN cDNA D430028G21 gene	NP_659137.1	NM_144888
1428384_at	0.014001	0.0168215	7.9	8	D4Bwg0951e	DNA segment, Chr 4, Brigham & Women's Genetics 0951 expressed	NP_081097.2	NM_026821
1438093_x_at	0.0448545	0.034145	7.9	8	Dbi	diazepam binding inhibitor	NP_001033088.1 /// NP_031856.1	NM_001037999 /// NM_007830
1433881_at	0.0198043	0.0233561	8	8	Dnajc11	DnaJ (Hsp40) homolog, subfamily C, member 11	NP_766292.1	NM_172704
1449278_at	0.00252123	0.00561604	8.3	8	Eif2ak3	eukaryotic translation initiation factor 2 alpha kinase 3	NP_034251.1	NM_010121
1418242_at	0.0345877	0.0446652	7.9	8	Faf1	Fas-associated factor 1	NP_032009.2	NM_007983
1426593_a_at	0.00333004	0.0023572	8	8	Fbxo22	F-box only protein 22	NP_082325.1	NM_028049
1426903_at	0.00762536	0.0284309	8.2	8	Fndc3a	fibronectin type III domain containing 3a	NP_997519.2	NM_207636
1456741_s_at	0.0303991	0.0366397	8.1	8	Gpm6a	glycoprotein m6a	NP_705809.1	NM_153581
1416399_a_at	0.00862844	0.00430736	8.1	8	Hmox2	heme oxygenase (decycling) 2	NP_034573.1	NM_010443
1432384_a_at	0.0131573	0.0136389	7.9	8	Mettl6	methyltransferase like 6	NP_080183.1	NM_025907
1433755_at	0.0156581	0.048309	8.1	8	Mier1	mesoderm induction early response 1 homolog (Xenopus laevis	NP_001034170.1 /// NP_081972.2	NM_001039081 /// NM_027696
1424280_at	0.0309404	0.0385067	8	8	Mospd1	motile sperm domain containing 1	NP_081685.1	NM_027409
1421064_at	0.0156581	0.0186282	8.3	8	Mpp5	membrane protein, palmitoylated 5 (MAGUK p55 subfamily member 5)	NP_062525.1	NM_019579
1424519_at	0.0105448	0.0493283	8.3	8	Mtg1	mitochondrial GTPase 1 homolog (S. cerevisiae)	NP_955005.1	NM_199301
1440921_at	0.0123078	0.0149241	8	8	Nalp12	NACHT, LRR and PYD containing protein 12	XP_909205.2 /// XP_923791.1 /// XP_923799.1 /// XP_978827.1 /// XP_978856.1 /// XP_978890.1	XM_904112 /// XM_918698 /// XM_918706 /// XM_973733 /// XM_973762 /// XM_973796
1450899_at	0.00390031	0.00888509	8	8	Nedd1	neural precursor cell expressed, developmentally down-regulated gene 1	NP_032708.1	NM_008682
1416027_at	0.0271844	0.0151219	8	8	Pdcd6	programmed cell death 6	NP_035181.1	NM_011051
1418190_at	0.0120464	0.0214393	8.1	8	Pon1	paraoxonase 1	NP_035264.1	NM_011134
1424488_a_at	0.0455187	0.0314849	7.8	8	Ppa2	pyrophosphatase (inorganic) 2	NP_666253.1	NM_146141
1433866_x_at	0.0184528	0.00576107	7.8	8	Prdx1	peroxiredoxin 1	NP_035164.1	NM_011034
1416282_at	0.00758178	0.017821	8.2	8	Psmc3	proteasome (prosome, macropain) 26S subunit, ATPase 3	NP_032974.1	NM_008948
1423990_at	0.00333004	0.0156384	8.2	8	Rab28	RAB28, member RAS oncogene family	NP_081571.1	NM_027295
1420941_at	0.0156581	0.0494693	8.2	8	Rgs5	regulator of G-protein signaling 5	NP_033089.2	NM_009063
1424873_at	0.0067056	0.0108103	8.1	8	Rnf2	ring finger protein 2	NP_035407.1	NM_011277
1423666_s_at	0.0131573	0.0154588	8.2	8	Rpl5 /// LOC382740 /// LOC665407 /// LOC668032 /// LOC672748 /// LOC675821	ribosomal protein L5 /// similar to 60S ribosomal protein L5 /// similar to 60S ribosomal protein L5 /// similar to 60S ribosomal protein L5 /// similar to 60S ribosomal protein L5 /// similar to 60S ribosomal protein L5	NP_058676.1 /// XP_981783.1	NM_016980 /// XM_976689 /// XR_001787 /// XR_002121 /// XR_003598 /// XR_003980 /// XR_004839
1423119_at	0.011948	0.033776	8.1	8	Rshl2	radial spokehead-like 2	NP_080065.3	NM_025789
1425948_a_at	0.009375	0.0136135	7.9	8	Slc25a30	solute carrier family 25, member 30	NP_080508.1	NM_026232
1450129_a_at	0.0195748	0.0274955	8.1	8	Socs6	suppressor of cytokine signaling 6	NP_061291.2	NM_018821
1433708_at	0.0117565	0.0271548	8.2	8	Srp68	signal recognition particle 68	NP_666144.3	NM_146032
1426411_a_at	0.0134939	0.0375066	7.9	8	Strbp /// C230082I21Rik	spermatid perinuclear RNA binding protein /// RIKEN cDNA C230082I21 gene	NP_033287.1	NM_009261
1424526_a_at	0.0149344	0.0219256	8.1	8	Tgds	TDP-glucose 4,6-dehydratase	NP_083854.2	NM_029578
1416926_at	0.0377738	0.0239548	8.1	8	Trp53inp1	transformation related protein 53 inducible nuclear protein 1	NP_068697.1	NM_021897
1455913_x_at	0.0249612	0.0225341	7.9	8	Ttr	transthyretin	NP_038725.1	NM_013697
1437615_s_at	0.0100012	0.0117044	8.1	8	Vps37c	Vacuolar protein sorting 37C (yeast)	NP_852068.1	NM_181403
1430987_s_at	0.0486789	0.0486716	8	8	Wbp11	WW domain binding protein 11	NP_068360.3	NM_021714
1438026_at	0.00110796	2.46e-05	8	8	Zfp560	zinc finger protein 560	NP_001004190.2	NM_001004190
1429623_at	0.000806728	4.79e-05	8.1	8	Zfp644	zinc finger protein 644	NP_081132.2	NM_026856
1447724_x_at	0.0258845	0.0217982	8.1	8	---	---	---	---
1452743_at	0.00357775	0.0275607	8	8	---	---	---	---
